1           **BpOmpW Antigen Stimulates the Necessary Immune Correlates of**  
2                                                   **Protection Against Melioidosis**

3     Julen Tomás-Cortázar<sup>1</sup>, Lorenzo Bossi<sup>2</sup>, Conor Quinn<sup>1</sup>, Catherine Reynolds<sup>3</sup>, David  
4     Butler<sup>3</sup>, Niamh Corcoran<sup>1</sup>, Maitiú Ó Murchú<sup>1</sup>, Eve McMahon<sup>1</sup>, Mahavir Singh<sup>7</sup>, Patpong  
5     Rongkard<sup>4</sup>, Juan Anguita<sup>5,6</sup>, Alfonso Blanco<sup>1</sup>, Susanna J. Dunachie<sup>4</sup>, Danny Altmann<sup>3</sup>,  
6     Rosemary Boyton<sup>3</sup>, Johan Arnold<sup>2</sup>, Severine Giltaire<sup>2</sup>, Siobhán McClean<sup>1\*</sup>.

7     <sup>1</sup> UCD Conway Institute, University College Dublin, Belfield, Dublin 4, Ireland.

8     <sup>2</sup> Immunxperts SA, Gosselies, Belgium.

9     <sup>3</sup> Lung Immunology Group, Department of Infectious Diseases, Faculty of Medicine,  
10    Imperial College London, London W12 ONN, United Kingdom.

11    <sup>4</sup> University of Oxford, Oxford, UK

12

13    <sup>5</sup> Inflammation and Macrophage plasticity lab, CIC bioGUNE-BRTA (Basque Research  
14    and Technology Alliance), Derio, Bizkaia, 48160. Spain.

15    <sup>6</sup> Ikerbasque, Basque Foundation for Science, Bilbao, 48012. Spain.

16    <sup>7</sup> LIONEX Diagnostics and Therapeutics GmbH, Brunswick, Germany.

17

18

19    \* **Corresponding authors:** [siobhan.mcclean@ucd.ie](mailto:siobhan.mcclean@ucd.ie); [julen.tomascortazar@ucd.ie](mailto:julen.tomascortazar@ucd.ie)

20

21    **Lead author:** Siobhán McClean, UCD Conway Institute, University College Dublin,  
22    Belfield, Dublin 4, Ireland. [siobhan.mcclean@ucd.ie](mailto:siobhan.mcclean@ucd.ie)

23

## 24 **SUMMMARY**

25 Melioidosis is a fatal disease caused by *Burkholderia pseudomallei* Gram-negative  
26 bacteria. It is the causative of 89,000 deaths per year in endemic areas of Southeast Asia  
27 and Northern Australia. Diabetes mellitus is the most risk factor, increasing 12-fold the  
28 susceptibility for severe disease. IFN- $\gamma$  responses from CD4 and CD8 T cells, but also  
29 from NK and NKT cells are necessary to eliminate the pathogen. Elucidating the immune  
30 correlates of protection of our previously described protective BpOmpW vaccine is an  
31 essential step of any vaccine before clinical trials. Thus, we immunized non-insulin  
32 resistant C57BL/6j mice and an insulin resistant C57BL/6j mouse model of Type 2  
33 Diabetes (T2D) with BpOmpW using Sigma Adjuvant System (SAS) (treatment) or SAS  
34 only (control). Two weeks later bloods and spleens were collected and serological  
35 analysis & in vitro exposure of splenocytes to the antigen for 60 hours were performed in  
36 both controls and treatment groups to finally analyze the stained splenocytes by flow  
37 cytometry. BpOmpW induced strong antibody response, stimulated effector CD4<sup>+</sup> and  
38 CD8<sup>+</sup> T cells and CD4<sup>+</sup> CD25<sup>+</sup> Foxp3<sup>+</sup> regulatory T cells and produced higher IFN- $\gamma$   
39 responses in CD4<sup>+</sup>, CD8<sup>+</sup>, NK and NKT cells relative to the control group in non-insulin  
40 resistant mice. T cell responses of insulin resistant mice to BpOmpW were comparable  
41 to those in non-insulin resistant mice. In addition, as a precursor to its evaluation in human  
42 studies, humanised HLA-DR and HLA-DQ transgenic mice elicited IFN- $\gamma$  recall  
43 responses in an ELISPoT-based study and PBMCs from donors that were in contact to  
44 BpOmpW for seven days experienced T cell proliferation. Finally, plasma from  
45 melioidosis survivors with diabetes recognized our BpOmpW vaccine antigen. Overall,  
46 these range of approaches used strongly indicate that BpOmpW elicits the required  
47 immune correlates of protection to combat melioidosis and bring the vaccine closer to  
48 clinical trials.

## 49 INTRODUCTION

50 Melioidosis is a potentially fatal tropical infection caused by the Gram-negative  
51 facultative intracellular bacillus *Burkholderia pseudomallei*. Melioidosis is endemic but  
52 increasingly emerging throughout the tropics. The global incidence is estimated to be  
53 165,000 cases per year with 89,000 deaths and a significant global burden in terms of  
54 death and quality of life (Limmathurotsakul et al 2016; Birnie et al, 2019). Infections  
55 generally arise from environmental exposure and present as a spectrum of disease ranging  
56 from local pathologies such as pneumonia or abscesses to systemic disease and sepsis  
57 (White, 2003; Wiersinga et al., 2008; Wiersinga et al., 2018). The case fatality rate varies  
58 from 35 to 42 % in Thailand (Hinjoy et al., 2018) to 26% recorded in Australia (Stephens  
59 et al., 2016). Importantly, individuals with diabetes mellitus (DM) have a 12-fold  
60 increased susceptibility to melioidosis and experience more severe disease (Wiersinga  
61 et al., 2018). DM affects over 450 million people worldwide (Cho et al. 2018) of which,  
62 90% are considered to have Type 2 Diabetes DM (T2DM) (Saeedi et al., 2019) and more  
63 than 50% of these individuals live in melioidosis endemic regions in Southeast Asia and  
64 Northern Australia (Dunachie & Chamnan, 2019). There is no licensed vaccine available  
65 to protect people in endemic regions from melioidosis, including those with T2DM.  
66 We previously reported the identification of an efficacious antigen against melioidosis,  
67 identified using a proteomic approach based on the homology between *B. pseudomallei*  
68 and *B. cenocepacia* complex (Bcc) (Casey et al., 2016; McClean et al., 2016). We showed  
69 that the protective Bcc homologue OmpW in *B. pseudomallei* (BpOmpW) protected two  
70 different mouse models, BALB/c and C57BL/6J, from *Bp* challenge with distinct MHC  
71 haplotypes against melioidosis (Casey et al. 2016). In particular, we showed that 75% of  
72 immunised mice survived a lethal infection for an extended period of 81 days, a sustained  
73 protection not previously shown for any single subunit vaccine and surpassing that of the

74 live attenuated vaccine 2D2, the benchmark against which all melioidosis vaccines are  
75 compared.

76 Understanding the correlates of protection is an important step in the development  
77 of any vaccine. Although the correlates of protection against melioidosis are poorly  
78 understood, it is clear that protection requires competent cellular immune responses  
79 mediated by T lymphocytes in both mice (Ketheesan et al. 2002) and humans (Jenjaroen  
80 et al., 2015). In particular, elevated IFN- $\gamma$  responses associated with CD4 and CD8 T cells  
81 are essential to combat the disease (Ketheesan et al., 2002). However, IFN- $\gamma$ -producing  
82 NK and NKT cells also participate in the response against melioidosis in mice (Haque et  
83 al., 2006) and in humans (Kronsteiner et al., 2019; Rongkard et al., 2020). Moreover,  
84 humoral immunity also contributes to the elimination of the bacteria in both mice and  
85 humans (Healey et al, 2005; Chaichana et al., 2018).

86 In order to further evaluate the BpOmpW antigen with a view to human trials, we  
87 have undertaken an investigation to establish the immune correlates of protection for this  
88 vaccine antigen. In particular, we have performed an in-depth analysis of the T cell  
89 responses associated with the BpOmpW antigen in C57BL/6J mice. Moreover, as  
90 diabetes is the most important risk factor for severe disease, most likely due to immune  
91 function dysregulation (Graves & Kayal et al. 2008; Daryabor et al., 2019), we also  
92 developed an insulin resistant mouse model to evaluate the immune responses to the  
93 BpOmpW antigen in the context of diabetes as recommended by the Steering Group on  
94 Melioidosis Vaccine development (Limmathurotsakul et al., 2015). Finally, we have  
95 examined the responses of human peripheral blood mononuclear cells (PBMCs) to the  
96 antigen.

97

98

## 99 **RESULTS**

### 100 **BpOmpW activated T cells and induced effector CD4<sup>+</sup> and CD8<sup>+</sup> T cells**

101 Activation of T cells is particularly important for effective vaccines against intracellular  
102 pathogens (Gilbert, 2012). Furthermore, given that T cell responses, especially IFN- $\gamma$   
103 responses, contribute to survival in acute melioidosis patients (Jenjaroen et al., 2015), we  
104 examined the T cell responses associated with BpOmpW immunization. Groups of 11  
105 mice were immunized once with recombinant BpOmpW. Serological analysis of the  
106 mouse sera following immunization showed strong seroconversion (Total IgG, IgG1 and  
107 IgG2a) at two weeks despite the mice receiving only one immunization (Fig. 1, A; Fig.  
108 S1, A-C). T cell responses were then determined in splenocytes that had been re-exposed  
109 (treatment) to antigen *in vitro* by measuring cytokine responses and a range of T cell  
110 markers using flow cytometry compared to antigen exposed splenocytes from the  
111 adjuvant only group (SAS control), (Fig. 1, A). Activation of BpOmpW re-stimulated  
112 splenocytes was demonstrated by a significant decrease in CD45RB expression ( $p <$   
113  $0.0001$ ; Fig. 1, B), while the levels of CD25 and CD44 were significantly increased in  
114 response to BpOmpW re-exposure in both CD4<sup>+</sup> and CD8<sup>+</sup> T cells when compared to  
115 splenocytes from SAS control mice ( $p < 0.0001$ ; Fig. 1, C-F). To further analyse the  
116 activation of T cells in immunized mice, we evaluated the relative expression of CD45RB  
117 and CD44 in both CD4<sup>+</sup> and CD8<sup>+</sup> T cells. BpOmpW stimulated the differentiation of T  
118 cells from naïve to effector T cells in the immunized mice compared to controls. Effector  
119 CD4<sup>+</sup> CD45RB<sup>lo</sup> CD44<sup>hi</sup> T cells were over-represented in antigen re-exposed splenocytes  
120 ( $p < 0.0001$ ; Fig. 1, G). Consistent with this, the naïve CD4<sup>+</sup> CD45RB<sup>hi</sup> CD44<sup>lo</sup> subset  
121 was significantly reduced in the BpOmpW immunized group relative to SAS control  
122 splenocytes ( $p < 0.0001$ ; Fig. 1, H). Likewise, both effector CD8<sup>+</sup> T cells CD45RB<sup>hi</sup>  
123 CD44<sup>hi</sup> (Fig. 1, I) and CD45RB<sup>lo</sup> CD44<sup>hi</sup> (Fig. 1, J) were increased following BpOmpW

124 immunization compared to SAS controls, whereas the number of naïve CD45RB<sup>hi</sup> CD44<sup>lo</sup>  
125 CD8<sup>+</sup> T cells were reduced (Fig. 1, K). These data show that the immunization with  
126 BpOmpW results in the generation of strong CD4<sup>+</sup>, CD8<sup>+</sup> T and B cell responses.  
127 We also investigated the CD8<sup>+</sup> and CD4<sup>+</sup> T cell populations more in detail and we  
128 observed that the BpOmpW immunisation induced the appearance of CD8<sup>hi</sup> and CD4<sup>hi</sup>  
129 populations (Fig. 2, A) that were absent in the control group splenocytes (Fig. 2, B).  
130 Further analysis of these populations demonstrated that they were predominantly CD8<sup>hi</sup>  
131 CD45RB<sup>hi</sup> CD44<sup>lo</sup> (Fig. 2, C; in red) and CD4<sup>hi</sup> CD45RB<sup>hi</sup> CD44<sup>lo</sup> subpopulations (Fig.  
132 2, D; in blue), in contrast to SAS control splenocytes that did not show these  
133 subpopulations (Fig. 2, E-F). Furthermore, splenocytes from SAS control mice showed a  
134 CD4<sup>hi</sup> population (Fig. 2, B), to a lesser extent than BpOmpW group, although the  
135 population was predominantly CD45RB<sup>lo</sup> CD44<sup>hi</sup> (Fig. 2, F).

136 **BpOmpW immunisation stimulated IFN- $\gamma$  responses in CD4<sup>+</sup>, CD8<sup>+</sup>, NK, and NKT**  
137 **cells and increased regulatory T cells.**

138 IFN- $\gamma$  responses dominate the immune response induced by melioidosis infection in  
139 patients (Koh et al., 2013). Therefore, in order to elucidate the T cell responses associated  
140 with BpOmpW immunisation, we evaluated a range of cytokine levels by flow cytometry.  
141 Although the autocrine growth factor IL-2 did not change in CD4<sup>+</sup> T cells, it was  
142 upregulated in CD8<sup>+</sup> T cells from the BpOmpW immunized group relative to the SAS  
143 control group (Fig. 3, A-B). The antigen elicited high levels of IFN- $\gamma$ , IL-4 and IL-17,  
144 indicating that CD4<sup>+</sup> T cells differentiated to Th1, Th2, and Th17 cells, indicative of a  
145 mixed Th response being elicited by BpOmpW ( $p < 0.0001$ ,  $p < 0.0001$ ,  $p < 0.0001$ ,  
146 respectively; Fig. 3, C-E). Additionally, IFN- $\gamma$  producing CD8<sup>+</sup> T cells were also more  
147 abundant following BpOmpW immunisation ( $p = 0.011$ , Fig. 3, F).

148 NK and NKT cells have been associated with patient responses to melioidosis,  
149 consequently we evaluated the responses of NK and NKT cells in BpOmpW-re-exposed  
150 splenocytes. A population of T cells that were negative for both CD4 and CD8 i.e. double  
151 negative (DN) cells were elevated in the BpOmpW immunized group relative to the SAS  
152 control group ( $p = 0.0001$ ; Fig. 3, G). Expression of CD49b<sup>+</sup> indicated that NKT cells  
153 constituted virtually all these DN cells (Fig. 3, H). Moreover, IFN- $\gamma$  and IL-17 responses  
154 produced by NKT cells were increased in BpOmpW immunized mice in comparison with  
155 the SAS adjuvanted control mice in contrast to IL-4 which remained comparable to SAS  
156 control splenocytes ( $p = 0.0062$ ,  $p < 0.0001$ ,  $p = 0.942$ , respectively; Fig. 3, I-K). Finally,  
157 IFN- $\gamma$ -producing CD49b<sup>+</sup> NK cells were also significantly higher in splenocytes from  
158 BpOmpW immunized mice following re-exposure to antigen, relative to the adjuvant  
159 only control group ( $p = 0.0025$ ; Fig. 3, L).

160 We also examined regulatory T cells as they can suppress proinflammatory damage  
161 produced by bacterial infections. Regulatory T cells were augmented in response to  
162 BpOmpW re-exposure in immunized mice relative to the spleen cells from adjuvant only  
163 control mice ( $p = 0.0007$ ; Fig. 3, M). Finally, many studies have observed elevated  
164 expression of TNF during melioidosis infection in humans and animal models (Wiersinga  
165 et al., 2007; Krishnananthasivam et al., 2017). In this study, TNF was upregulated in both  
166 CD4<sup>+</sup> and CD8<sup>+</sup> T cells from BpOmpW immunized mice ( $p < 0.0001$ ,  $p < 0.0001$ ,  
167 respectively; Fig. 3, N-O).

168 **The immune response of insulin resistant mice to BpOmpW was predominantly**  
169 **comparable to that of non-insulin resistant mice**

170 Due to the exquisitely enhanced susceptibility of people with diabetes to melioidosis  
171 infection, and that type 2 diabetes (T2D) is on the rise in tropical and subtropical regions,  
172 we needed to understand the immune response in the context of diabetes. We developed

173 a polygenic insulin resistant mouse model by feeding C57BL/6J male mice with a high-  
174 fat diet (HFD) for up to 16 weeks as a model of T2D diabetes. Mice on the HFD  
175 continuously gained more weight than their litter mates on a normal diet from the first  
176 two weeks of HFD feeding ( $25.49 \pm 2.12$  vs  $29.38 \pm 0.82$ ;  $p = 0.00001$ ) at week 12 (Fig  
177 S2 B). Moreover, starting at week eight, HFD-fed mice began to develop hyperglycemia  
178 (HG:  $13.17 \pm 2.16$  vs  $15.66 \pm 2.77$ ;  $p = 0.02$ ) and insulin resistance (IR ( $t_{45}$ ):  $46.52 \pm$   
179  $16.26$  vs  $59.89 \pm 23.20$ ;  $p = 0.13$ ), the latter more apparent at 12 weeks of treatment with  
180 the diet (HG:  $11.44 \pm 1.89$  vs  $13.82 \pm 3.11$ ;  $p = 0.044$ . IR ( $t_{45}$ ):  $44.19 \pm 8.20$  vs  $98.32 \pm$   
181  $17.92$ ;  $p < 0.00001$ ) (Fig S2 C-E). In addition, large lipid droplets were observed in the  
182 livers of insulin resistant mice relative to control mice liver micrographs (Fig. S2, F).

183 To determine the impact of insulin resistance on the response to BpOmpW  
184 immunisation, groups of insulin resistant mice (Fig. S3, A) were immunized with one  
185 subcutaneous injection of adjuvant alone or with SAS-adjuvanted BpOmpW as before.  
186 After two weeks, the splenocytes of both groups were exposed to BpOmpW and  
187 immunophenotyped. Unexpectedly, CD45RB was not decreased in insulin resistance  
188 model ( $p = 0.6198$ ; Fig. 4, A), despite the T cell activation markers, CD25 and CD44,  
189 being consistently elevated in both CD4<sup>+</sup> and CD8<sup>+</sup> T cells in BpOmpW immunised group  
190 with respect to the SAS control group ( $p < 0.0001$ ,  $p < 0.0001$ ,  $p = 0.0001$ ,  $p = 0.0039$ ,  
191 respectively; Fig. 4, B-E), which was comparable to non-insulin resistant mice. Insulin  
192 resistant BpOmpW immunised mice showed elevated levels of IL-2 in both CD4<sup>+</sup> and  
193 CD8<sup>+</sup> T cells following exposure to vaccine antigen relative to the splenocytes from  
194 adjuvant control mice ( $p = 0.0004$  and  $p = 0.0003$  respectively; Fig. 4, F-G) in contrast to  
195 the non-insulin resistant mice, which only showed upregulation of IL-2 in CD8<sup>+</sup> T cells.  
196 Splenocyte cytokine responses from BpOmpW-immunised insulin resistant mice showed  
197 upregulated Th1 and Th17 responses as determined by the levels of IFN- $\gamma$  and IL-17 in



198 CD4 T cells, respectively ( $p < 0.0001$ ;  $p < 0.0001$ ; Fig. 4, H-I). In contrast to non-insulin  
199 resistant mice, Th2 response-associated IL-4 levels in CD4<sup>+</sup> T cells were unaltered with  
200 respect to the control group ( $p = 0.2919$ ; Fig. 4, J). Remarkably, after antigen re-  
201 stimulation, IFN- $\gamma$  producing cytotoxic CD8 and NKT cells were also increased in  
202 BpOmpW immunised insulin resistant mice relative to the SAS control group ( $p = 0.0005$ ,  
203  $p = 0.0013$ ; Fig. 4, K-L), with the exception of IFN- $\gamma$  producing NK cells which remained  
204 unchanged ( $p = 0.6148$ ; Fig. 4, M). Moreover, no significant changes were seen in IL-4  
205 or IL-17-expressing NKT cells (Fig. 4, N-O). In contrast to non-insulin resistant mice,  
206 regulatory T cell levels remained unmodified ( $p$  value = 0.1729) in the splenocytes from  
207 BpOmpW immunised mice relative to SAS control splenocytes (Fig. 4, P). TNF in CD4  
208 T cells was unchanged relative to the control group in the insulin resistance study (Fig.  
209 4, Q), whereas TNF from CD8<sup>+</sup> T cells was more abundant in BpOmpW group compared  
210 to control cells ( $p = 0.012$ ; Fig. 4, R). We also analysed antibody responses and naïve and  
211 effector T cells in the insulin resistant model. We observed strong seroconversion (Fig.  
212 S3, B-D) and elevated effector T cells in the presence of BpOmpW (Fig. S3, E-I). Overall  
213 there were no remarkable changes in these immune parameters relative to the non-insulin  
214 resistant mice.

### 215 **BpOmpW elicited the IFN- $\gamma$ recall responses in humanised HLA-DR and HLA-DQ** 216 **transgenic mice**

217 This and our previous work clearly demonstrate that BpOmpW antigen is immunogenic  
218 and elicits protective T cell responses in mice, thus as a precursor to its evaluation in  
219 human studies, we wanted to examine the responses in humanized HLA transgenic mice  
220 expressing different HLA alleles. The IFN- $\gamma$  responses to the whole antigen were  
221 examined for HLA-DR1, HLA-DR4 and HLA-DQ8 alleles. In addition, a synthetic panel  
222 of overlapping peptides was generated covering the full coding sequence (Table 1) and

223 these were also evaluated in humanised transgenic mice. Lymph nodes of HLA class II  
224 transgenic mice (HLA-DR1, HLA-DR4, and HLA-DQ8) that had been immunized with  
225 recombinant BpOmpW antigen showed strong recall responses to the whole BpOmpW  
226 antigen and to immunodominant T cell epitopes, P5, P7, P12, P21 as determined by IFN-  
227  $\gamma$  ELISpot assay (Fig. 5). When probed further by priming of additional HLA-DR4  
228 transgenic mice with P5 or P21, ELISpot analysis of drain lymph node cells confirmed  
229 that peptide 5 was a T-cell epitope. Subsequent priming of additional HLA-DQ8 mice  
230 with P7 confirmed that in HLA-DQ8 transgenics, P7 was a T-cell epitope (Fig. 5).

### 231 **BpOmpW induced T cell proliferation in human PMBCs**

232 To examine the responses of human cells, we examined the T cell proliferation and IFN-  
233  $\gamma$  responses of human PBMCs from donors in response to BpOmpW exposure. We  
234 interrogated human PBMCs from three different donors for CD3, CD4 and CD8 T cell  
235 markers following exposure to BpOmpW with and without adjuvant. T cell proliferation  
236 by BpOmpW was confirmed in all three different donor cell populations (Fig. 6 A, as  
237 proliferating cells for CD3, CD4 and CD8 populations were all elevated following  
238 exposure to the antigen with or without SAS adjuvant relative to the untreated control  
239 group (Fig. 6 A). T cells from donor 645 proliferated the most (Fig. 6 A) and cells from  
240 this donor were the only ones that showed significantly elevated IFN- $\gamma$  responses in the  
241 presence of the antigen or when adjuvanted with respect to the control group (Fig. 6 B).

### 242 **BpOmpW is recognized by plasma from melioidosis survivors with Diabetes**

243 We have shown that BpOmpW stimulates strong serological responses in mice, both in  
244 non-insulin resistant (Casey et al., 2016) and in insulin resistant mice. In order to examine  
245 whether the antigen can stimulate a humoral response in melioidosis patients with  
246 diabetes, we examined the presence of BpOmpW-specific antibodies in sera from people  
247 with diabetes that survived melioidosis infection (Fig. 7). We showed that the melioidosis

248 survivor cohort with diabetes (M) had significantly higher BpOmpW-specific IgG  
249 responses than the healthy cohort with diabetes ( $p = 0.0289$ , D) and the non-endemic  
250 control ( $p = 0.0023$ , NE) groups, indicating that BpOmpW is specifically recognized and  
251 immunogenic in people with diabetes. No significant difference in IgG levels was seen  
252 between the melioidosis cohort and healthy household contacts ( $p = 0.0537$ , HH), most  
253 likely due to the endemic nature of melioidosis in Thailand.

## 254 **DISCUSSION**

255 Melioidosis is a neglected tropical disease caused by the obligate intracellular bacterium  
256 *Burkholderia pseudomallei*. The continued emergence of this pathogen throughout  
257 tropical and subtropical regions (Wiersinga et al., 2012) together with the global increase  
258 of T2DM (Lin et al. 2020) is a cause of major concern in these areas and has accelerated  
259 the search of new remedies to combat this disease (Estes et al., 2010). Although the  
260 protective immune response against *B. pseudomallei* is not fully understood, it is well  
261 acknowledged that an effective vaccine should induce both T-cell and B-cell responses.  
262 Therefore, the elucidation of correlates of protection of the BpOmpW antigen in  
263 preclinical studies is essential in order to advance the development of an efficacious  
264 human T cell inducing vaccine against melioidosis.

265 The strong humoral responses elicited produced by BpOmpW in our earlier study (Casey  
266 et al. 2016) were also reproduced in this study in both non-insulin resistant and insulin  
267 resistant mice, confirming that the vaccine elicits potent specific antibody responses  
268 against BpOmpW. The splenocytes from BpOmpW immunized mice re-exposed to  
269 BpOmpW showed substantial activation and differentiation relative to control mice, as  
270 shown for example in the expression of CD25, and CD44 in both CD4 and CD8 T cells.  
271 T cell activation also leads to CD45RB regulation, an essential marker that determines  
272 the fate of T cells from naïve to memory cells. The generation of effector T cells that will

273 undergo development to memory cells is an essential correlate of protection in  
274 determining the efficacy of vaccines (Robinson & Amara, 2005; Aravindhan et al., 2006).  
275 All effector subsets evaluated, i.e., effector CD4 and effectors CD8 were increased in  
276 BpOmpW immunized group, indicating that the antigen produces a robust effector recall  
277 response that is likely to lead to a memory response, a hallmark of an efficacious vaccine.  
278 The early immune responses to control melioidosis infection are predominantly mediated  
279 by IFN- $\gamma$  in both CD4<sup>+</sup> and CD8<sup>+</sup> T cells, and as recently reported in NK and DN cells  
280 (Kronsteiner et al., 2019; Rongard et al., 2020). In this study, all these IFN- $\gamma$  producing  
281 cell subsets were upregulated in the presence of the BpOmpW antigen, indicating that it  
282 elicits the required correlates of protection to combat the disease. Further, the vaccine  
283 elicited a mixed Th response, which is in line with the reported dominant Th2 and Th17  
284 response at the initial stages of infection (Krishnananthasivam et al. 2017). The  
285 expression of the proinflammatory cytokine TNF is a typical murine host immune  
286 response to *B. pseudomallei* and was secreted in response to BpOmpW immunisation. At  
287 the same time, the elevated number of regulatory T cells following BpOmpW  
288 immunization observed in non-insulin resistant mice are required to reduce the excessive  
289 proinflammatory cascade of cytokines by bacterial lipopolysaccharides (Kessler et al.,  
290 2017). Finally, the fact that BpOmpW produced CD4<sup>hi</sup> and CD8<sup>hi</sup> populations suggest  
291 that, upon strong antigen stimulation, both populations of CD4<sup>hi</sup> and CD8<sup>hi</sup> may change  
292 from activated CD45RB<sup>lo</sup> CD44<sup>hi</sup> to naïve-like CD45RB<sup>hi</sup> CD44<sup>lo</sup> subsets in the  
293 BpOmpW group splenocytes as a regulatory mechanism against the strong antigen  
294 stimulation, although further analysis will be conducted to clarify this hypothesis.  
295 C57BL/6J mice are widely used as a model for chronic melioidosis (Hodgson et al., 2013  
296 (Limmathurotsakul et al., 2015). HFD fed C57BL/6J mouse model has been previously  
297 used to study the immune responses impaired by DM in vaccine development (Haffer,

298 2012; Hodgson, 2013; Yoshida et al., 2020). In agreement with previous reports the mice  
299 gained weight and developed hyperglycemia and insulin resistance and showed the  
300 presence of lipid droplets in the liver within 12 weeks of HFD feeding. DM alters the  
301 adaptive immunity to infections (Hodgson et al., 2015), including melioidosis  
302 (Kronsteiner et al., 2019). The immune response to BpOmpW in insulin resistant mice  
303 was generally comparable to that seen in non-insulin resistant mice with some  
304 differences. BpOmpW re-exposure in insulin resistant mice maintained an activated T  
305 cell status and high IFN- $\gamma$  recall responses from CD4, CD8, and NKT cells, which would  
306 be essential to protect people with diabetes from melioidosis. Non-insulin resistant mice  
307 showed a mixed Th1, Th2, Th17 response, in response to BpOmpW immunisation in re-  
308 exposed splenocytes, in line with the Bcc-OmpW homolog examined previously  
309 (McClellan et al., 2016). In contrast, insulin resistant mice showed Th1 and Th17  
310 responses with no apparent Th2 response following BpOmpW immunisation. This is  
311 consistent with the fact that C57BL/6J strain preferentially differentiate to Th1 phenotype  
312 in response to HFD (Jovicic et al., 2015). Moreover, several studies also reported a  
313 delayed Th2 response in obese-allergic mice (Calixto et al., 2010; Silva et al., 2017;  
314 Esteves de Oliveira et al., 2019). Obesity, diabetes, and insulin resistance phenotypes  
315 produce proinflammatory cytokines that, in turn, are reported to downregulate regulatory  
316 T cells required to prevent the excessive inflammatory responses (Wagner et al., 2013;  
317 Cipolleta, 2014). In this work, regulatory T cells remained comparable to the control in  
318 the insulin resistance mice probably due to the stimulative effect of BpOmpW.  
319 The T cell proliferation seen in different human PBMCs following BpOmpW exposure  
320 indicated that the vaccine antigen will also elicit T cell responses in humans. Moreover,  
321 the strong recall response of all HLA transgenic mice tested to the complete BpOmpW  
322 antigen indicates that the T-cell responses identified in humans are likely to translate to

323 IFN- $\gamma$  responses across diverse HLA isotypes. In contrast to other studies in which the  
324 identification of the candidate antigens was done on the basis of their reactivity against  
325 patient antisera, we looked for BpOmpW-specific antibodies in plasma from different  
326 cohorts, including survivors to melioidosis. The finding that BpOmpW also stimulated  
327 strong IgG responses in melioidosis survivors also indicates that it is likely to translate to  
328 a protective vaccine antigen to protect against this disease, although the ultimate test will  
329 require human trials. Overall the range of approaches used to elucidate whether the  
330 BpOmpW antigen elicits the necessary correlates of protection in humans strongly  
331 suggest that BpOmpW will elicit robust responses in humans and bring the vaccine closer  
332 to clinical trials.

333

## 334 **MATERIAL AND METHODS**

335

### 336 **BpOmpW Expression and purification**

337 The recombinant BpOmpW used in all experiments except ELISpot analysis of transgenic  
338 mice was expressed, purified and provided by Lionex GmbH in 20mM Ammonium  
339 bicarbonate. In the case of transgenic mouse studies, the pRSET\_BpOmpW construct was  
340 transformed in BL21(DE3) cells and cultured in LB with 1M D-Sorbitol and 2.5mM  
341 glycine betaine for five days at 22°C. The His-tag fusion protein was then purified by  
342 nickel affinity chromatography with endotoxin-free PBS, 35mM imidazole, and 2%  
343 Triton X-100 and eluted in endotoxin-free PBS containing 250mM imidazole and 2%  
344 Triton X-100. The antigen was further purified by gel filtration chromatography. The  
345 affinity chromatography fraction containing the antigen (as identified by SDS-PAGE)  
346 was concentrated and loaded onto a HiLoad 16/600 GL Superdex 75 column (GE  
347 Healthcare) pre-equilibrated in endotoxin-free PBS using an AKTA chromatography  
348 system (GE Healthcare). Fractions with the protein of interest were pooled and the protein

349 was concentrated and stored at  $-80^{\circ}\text{C}$  until its use. Protein concentration was determined  
350 using the BCA protein assay kit (Thermo Fisher Scientific) and used for immunisation of  
351 transgenic mice and ELISpot assays.

### 352 **Ethics statement**

353 All work involving animals was approved by University College Dublin Ethics  
354 Committee (AREC-19-13-McClean), and mice were maintained according to the  
355 regulations of the Health Products Regulatory Authority (Directive 2010/63/EU and Irish  
356 Statutory Instrument 543 of 2012) with the Authorisation number AE18982/P166.

357 For the human plasma samples from melioidosis patients and controls in Northeast  
358 Thailand, the study protocol was approved by the ethics committees of the Faculty of  
359 Tropical Medicine, Mahidol University (TMEC 12-014); Sunpasitthiprasong Hospital,  
360 Ubon Ratchathani (017/2559) and the Oxford Tropical Research Ethics Committee  
361 (OXTREC35-15). Blood samples were collected from in-patients with culture-confirmed  
362 melioidosis (M), diabetic patients (D), and healthy participants from the endemic areas  
363 who were household contacts of the melioidosis cases (HH) at Sunpasitthiprasong  
364 Hospital, Ubon Ratchathani, Thailand between 2015 and 2017.

365 All experiments used cryopreserved primary cells, i.e. PBMC, which were isolated from  
366 whole blood donated by healthy volunteers.

367 Whole blood was collected from healthy donors as described in the ethical protocol IXP-  
368 003\_V1 (Belgian registration number B707201627607) or protocol IXP-004\_V1 (The  
369 Netherlands; Reg. Nr. NL57912.075.16). All blood samples were tested and found  
370 negative for HBV, HCV and HIV. PBMC were separated from the blood by density  
371 gradient centrifugation and subsequently cryopreserved in FBS, supplemented with 10%  
372 dimethyl sulfoxide, by controlled rate freezing. The PBMCs were kept in cryogenic  
373 storage ( $-180^{\circ}\text{C}$ ) until use.

374 **Immunisation of C57BL/6J mice for immunophenotyping**

375 Male C57BL/6J mice were used in these studies and were given free access to food and  
376 water and subjected to a 12h light/dark cycle. Groups of C57BL/6J male mice were  
377 immunized subcutaneously with 50µg BpOmpW in Sigma Adjuvant System (SAS,  
378 Sigma) or SAS adjuvant alone as negative control. Two weeks later, mice were humanely  
379 killed by sedation with isoflurane followed by CO<sub>2</sub> exposure and, blood removed by  
380 cardiac puncture for serological analysis. Spleens were also processed for splenocyte  
381 restimulation with the vaccine antigen.

382 **Determination of BpOmpW-specific IgG isotypes by ELISA**

383 Microtitre plates were coated with purified BpOmpW in sodium bicarbonate buffer (pH  
384 9.4) at 4°C overnight. Coating solution was removed, and plates blocked with 10% FBS  
385 solution in PBS at room temperature for 1h. Wells were washed three times with 0.05%  
386 Tween 20 in PBS using a plate washer. Serum samples were serially diluted (5-fold) in  
387 PBS containing 10% FBS and 100µl added to wells in triplicates at RT for 2h. Plates were  
388 washed three times as described above with PBS 0.05% Tween 20 before the addition of  
389 anti-mouse IgG, IgG1 or IgG2a-HRP conjugated antibodies (ab97023, ab97240,  
390 ab97245, respectively from Abcam) at RT for one hour. Then, TMB substrate was added  
391 and incubated until the colour developed. Reactions were stopped with 2M sulfuric acid  
392 and plates read at 450nm.

393 For the detection of BpOmpW-specific IgG in human plasma the same protocol was  
394 applied using anti- human IgG antibody (ab6858, abcam) in place of anti-mouse IgG  
395 antibodies.

396 **Splenocyte Restimulation with BpOmpW antigen.**

397 Splenocytes were extracted from the spleens using Ammonium-Chloride-Potassium  
398 (ACK) lysing buffer to remove red blood cells. Cells from BpOmpW immunized or SAS



399 adjuvant only treated control mice were then counted automatically (Invitrogen). One  
400 million cells were plated per well, and stimulated for 60h with 50µg/mL BpOmpW in 96-  
401 well-plate using 10% FBS RPMI medium and P/S. Between five and six hours before  
402 harvesting the cells, 5µg/mL Brefeldin A was added to block cell trafficking in order to  
403 increase the accumulation of intracellular cytokines. Cells were collected by  
404 centrifugation and stained for flow cytometry.

#### 405 **Flow Cytometry**

406 The cells were incubated with Fc Block (anti-CD16/CD32; BD BioSciences) for 5  
407 minutes (TEMP) and labeled with Viakrome 808 (Beckman Coulter) and fluorochrome-  
408 labeled antibodies against CD4, CD49b, CD45RB, CD8a, CD25, CD44 and CD3 surface  
409 markers (BD Biosciences) for 30 minutes (TEMP). Then, intracellular IL-2, IL-4, IFN-γ,  
410 IL-9, TNF, and Foxp3 (BD Bioscience) were also analyzed with a BD  
411 Cytofix/CytoPerm™/Fixation/Permeabilization Solution Kit (BD Biosciences)  
412 according to the manufacturer instructions. The gating strategy and the corresponding  
413 FMOs for each gate are shown in Figure S3-S9.

#### 414 **Polygenic Insulin Resistant Mouse Model**

415 Seventy C57BL/6J male mice were fed with D12492i rodent diet comprised of 60% kcal  
416 from fat (Research Diets, Inc) or regular chow starting at 6-8 weeks of age until they were  
417 humanely killed. Insulin resistance was determined at 8 and 12 weeks by fasting the mice  
418 for 6h at which time 0.5 units/Kg of insulin was administered subcutaneously. In order to  
419 alleviate any pain, EMLA cream was applied to the whole tail 10 minutes before blood  
420 was sampled from the tail vein using a 27-gauge needle, a drop of blood extracted at 15,  
421 30, 45 & 60 minutes, and glucose levels measured by AlphaTRAK® 2 Blood Glucose  
422 Monitor. To characterise the model, we collected the spleen, liver, pancreas, kidney from  
423 the mice and H&E stain was applied to tissue cut sections. The time required for

424 individual mice to develop insulin resistance varied and only mice that showed insulin  
425 resistance were considered eligible to be randomly selected for immunization studies.

#### 426 **ELISpot analysis of IFN- $\gamma$ recall response to antigen or peptides.**

427 This study used HLA class II transgenic mouse lines for the alleles HLA-DR1  
428 (DRB1\*0101), HLA-DR4 (DRB1\*0401) and HLA-DQ8 (DQB1\*0302), which were in  
429 each case maintained in the context of a homozygous knockout for murine H2-Ab. Mice  
430 were maintained in individually ventilated cages and were used in experiments as age-  
431 and sex-matched, young adults. For CD4 T cell epitope mapping studies, mice were  
432 primed in one hind footpad with 25mg antigen emulsified in Hunters Titermax Gold  
433 adjuvant (Sigma-Aldrich). At day 10, the draining popliteal lymph node was removed  
434 and disaggregated into a single-cell suspension for ELISpot assays. The frequency of cells  
435 producing IFN- $\gamma$  in responses to antigen was quantified with ELISpot (Diaclone; 2B  
436 Scientific, Oxon, U.K.) performed in HL-1 serum-free medium (BioWhittaker; Lonza,  
437 Slough, U.K.), supplemented with L-glutamine and penicillin–streptomycin (Life  
438 Technologies, Paisely,U.K.). Cells (23105) plus antigen were added to wells and plates  
439 and were incubated for 72 h at 37°C with 5% CO<sub>2</sub>. Unless otherwise indicated, peptide  
440 was added to wells at a final concentration of 25mg/ml. Spots were counted on an  
441 automated ELISpot reader (Autoimmun Diagnostika,Strasbourg, France). Response  
442 frequencies were expressed as  $\Delta$ SFC/10<sup>6</sup>cells, with the presence of an epitope being  
443 confirmed when the majority of mice in the immunized group responded with a  
444 magnitude greater than the mean number of spot-forming cells (SFCs) in medium only  
445 control + 2 SD. Mean + 2 SD background SFC for murine ELISpot data are indicated in  
446 each case by a dotted line on the figures. The ELISpot background ranges (per 10<sup>6</sup> cells)  
447 were 0 to 30 SFC.

#### 448 **Statistical Analysis**

449 Results are presented as means  $\pm$  SE unless otherwise stated. The differences in means  
450 between groups were tested using a T-test using GraphPad Prism, version 7. A p-  
451 value  $< 0.05$  was considered statistically significant.

452

### 453 **ACKNOWLEDGEMENTS**

454 Supported by a Wellcome Trust Innovator Award to SMcC (209274/Z/17/Z). JTC is  
455 recipient of the Basque Government Postdoctoral Fellowship. CQ is a recipient of funding  
456 from UCD<sup>2</sup> Transatlantic One Health Alliance.

457

## 458 **AUTHOR CONTRIBUTION**

459 Performed the experiments: JTC, LB, CQ, CR, DB, NC, MOM, EM Analyzed the data:  
460 JTC, JA, AB, DA, RB, SMcC. Designed and supervised the experiments: JTC, JA, AB,  
461 DA, RB, JA, SG, SMcC. Wrote the manuscript: JTC, SMcC.

## 462 **ETHICS DECLARATION**

### 463 **Competing Interests**

464 The authors declare that they have no competing interests.

465

## 466 **REFERENCES**

- 467 1. Aravindhan, V. et al. T-h-2 immunity and CD3+CD45RBlow-activated T cells  
468 in mice immunized with recombinant bacillus Calmette-Guérin expressing HIV-  
469 1 principal neutralizing determinant epitope. *FEMS Immunol Med Microbiol* 47,  
470 45-55 (2006).  
471
- 472 2. Birnie, E. et al. Global burden of melioidosis in 2015: a systematic review and  
473 data synthesis. *Lancet Infect Dis* 19, 892-902 (2019).  
474
- 475 3. Casey, W.T. et al. Identification of an OmpW homologue in *Burkholderia*  
476 *pseudomallei*, a protective vaccine antigen against melioidosis. *Vaccine* 34,  
477 2616-2621 (2016).  
478
- 479 4. Chaichana, P. et al. Antibodies in Melioidosis: The Role of the Indirect  
480 Hemagglutination Assay in Evaluating Patients and Exposed Populations. *Am J*  
481 *Trop Med Hyg* 99, 1378-1385 (2018).  
482

- 483 5. Cho, N.H. et al. IDF Diabetes Atlas: Global estimates of diabetes prevalence for  
484 2017 and projections for 2045. *Diabetes Res Clin Pract* 138, 271-281 (2018).  
485
- 486 6. Cipolletta, D. Adipose tissue-resident regulatory T cells: phenotypic  
487 specialization, functions and therapeutic potential. *Immunology* 142, 517-525  
488 (2014).  
489
- 490 7. Daryabor, G., Kabelitz, D. & Kalantar, K. An update on immune dysregulation  
491 in obesity-related insulin resistance. *Scand J Immunol* 89, e12747 (2019).  
492
- 493 8. Dunachie, S. & Chamnan, P. The double burden of diabetes and global infection  
494 in low and middle-income countries. *Trans R Soc Trop Med Hyg* 113, 56-64  
495 (2019).  
496
- 497 9. Estes, D.M., Dow, S.W., Schweizer, H.P. & Torres, A.G. Present and future  
498 therapeutic strategies for melioidosis and glanders. *Expert Rev Anti Infect Ther*  
499 8, 325-338 (2010).  
500
- 501 10. Gilbert, S.C. T-cell-inducing vaccines - what's the future. *Immunology* 135, 19-  
502 26 (2012).  
503
- 504 11. Graves, D.T. & Kayal, R.A. Diabetic complications and dysregulated innate  
505 immunity. *Front Biosci* 13, 1227-1239 (2008).  
506

- 507 12. Haffer, K.N. Effects of novel vaccines on weight loss in diet-induced-obese  
508 (DIO) mice. *J Anim Sci Biotechnol* 3, 21 (2012).  
509
- 510 13. Haque, A. et al. Role of T cells in innate and adaptive immunity against murine  
511 *Burkholderia pseudomallei* infection. *J Infect Dis* 193, 370-379 (2006).  
512
- 513 14. Healey, G.D., Elvin, S.J., Morton, M. & Williamson, E.D. Humoral and cell-  
514 mediated adaptive immune responses are required for protection against  
515 *Burkholderia pseudomallei* challenge and bacterial clearance postinfection.  
516 *Infect Immun* 73, 5945-5951 (2005).  
517
- 518 15. Hinjoy, S. et al. Melioidosis in Thailand: Present and Future. *Trop Med Infect*  
519 *Dis* 3, 38 (2018).  
520
- 521 16. Hodgson, K.A., Govan, B.L., Walduck, A.K., Ketheesan, N. & Morris, J.L.  
522 Impaired early cytokine responses at the site of infection in a murine model of  
523 type 2 diabetes and melioidosis comorbidity. *Infect Immun* 81, 470-477 (2013).  
524
- 525 17. Jenjaroen, K. et al. T-Cell Responses Are Associated with Survival in Acute  
526 Melioidosis Patients. *PLoS Negl Trop Dis* 9, e0004152 (2015).  
527
- 528 18. Jovicic, N. et al. Differential Immunometabolic Phenotype in Th1 and Th2  
529 Dominant Mouse Strains in Response to High-Fat Feeding. *PLoS One* 10,  
530 e0134089 (2015).  
531

- 532 19. Kessler, B. et al. Interleukin 10 inhibits pro-inflammatory cytokine responses  
533 and killing of *Burkholderia pseudomallei*. *Sci Rep* 7, 42791 (2017).  
534
- 535 20. Ketheesan, N. et al. Demonstration of a cell-mediated immune response in  
536 melioidosis. *J Infect Dis* 186, 286-289 (2002).  
537
- 538 21. Koh, G.C. et al. Host responses to melioidosis and tuberculosis are both  
539 dominated by interferon-mediated signaling. *PLoS One* 8, e54961 (2013).  
540
- 541 22. Krishnananthasivam, S., Sathkumara, H.D., Corea, E., Natesan, M. & De Silva,  
542 A.D. Gene Expression Profile of Human Cytokines in Response to. *mSphere* 2  
543 (2017).  
544
- 545 23. Kronsteiner, B. et al. Diabetes alters immune response patterns to acute  
546 melioidosis in humans. *Eur J Immunol* 49, 1092-1106 (2019).  
547
- 548 24. Limmathurotsakul, D. et al. Consensus on the development of vaccines against  
549 naturally acquired melioidosis. *Emerg Infect Dis* 21 (2015).  
550
- 551 25. Limmathurotsakul, D. et al. Predicted global distribution of *Burkholderia*  
552 *pseudomallei* and burden of melioidosis. *Nat Microbiol* 1, 15008 (2016).  
553
- 554 26. Lin, X. et al. Global, regional, and national burden and trend of diabetes in 195  
555 countries and territories: an analysis from 1990 to 2025. *Sci Rep* 10, 14790  
556 (2020).

557

558 27. McClean, S. et al. Linocin and OmpW Are Involved in Attachment of the Cystic  
559 Fibrosis-Associated Pathogen *Burkholderia cepacia* Complex to Lung Epithelial  
560 Cells and Protect Mice against Infection. *Infect Immun* 84, 1424-1437 (2016).

561

562 28. McClean, S. et al. Linocin and OmpW Are Involved in Attachment of the Cystic  
563 Fibrosis-Associated Pathogen *Burkholderia cepacia* Complex to Lung Epithelial  
564 Cells and Protect Mice against Infection. *Infect Immun* 84, 1424-1437 (2016).

565

566 29. Robinson, H.L. & Amara, R.R. T cell vaccines for microbial infections. *Nat*  
567 *Med* 11, S25-32 (2005).

568

569 30. Rongkard, P. et al. Human Immune Responses to Melioidosis and Cross-  
570 Reactivity to Low-Virulence *Burkholderia* Species, Thailand. *Emerg Infect Dis*  
571 26, 463-471 (2020).

572

573 31. Saeedi, P. et al. Global and regional diabetes prevalence estimates for 2019 and  
574 projections for 2030 and 2045: Results from the International Diabetes  
575 Federation Diabetes Atlas, 9. *Diabetes Res Clin Pract* 157, 107843 (2019).

576

577 32. Stephens, D.P., Thomas, J.H., Ward, L.M. & Currie, B.J. Melioidosis Causing  
578 Critical Illness: A Review of 24 Years of Experience From the Royal Darwin  
579 Hospital ICU. *Crit Care Med* 44, 1500-1505 (2016).

580



- 581 33. Wagner, N.M. et al. Circulating regulatory T cells are reduced in obesity and  
582 may identify subjects at increased metabolic and cardiovascular risk. *Obesity*  
583 (Silver Spring) 21, 461-468 (2013).
- 584
- 585 34. White, N.J. Melioidosis. *Lancet* 361, 1715-1722 (2003).
- 586
- 587 35. Wiersinga, W.J., Currie, B.J. & Peacock, S.J. Melioidosis. *N Engl J Med* 367,  
588 1035-1044 (2012).
- 589
- 590 36. Wiersinga, W.J. et al. High-throughput mRNA profiling characterizes the  
591 expression of inflammatory molecules in sepsis caused by *Burkholderia*  
592 *pseudomallei*. *Infect Immun* 75, 3074-3079 (2007).
- 593
- 594 37. Wiersinga, W.J., Dessing, M.C. & van der Poll, T. Gene-expression profiles in  
595 murine melioidosis. *Microbes Infect* 10, 868-877 (2008).
- 596
- 597 38. Wiersinga, W.J. et al. Melioidosis. *Nat Rev Dis Primers* 4, 17107 (2018).
- 598
- 599 40. Yoshida, S. et al. The CD153 vaccine is a senotherapeutic option for preventing  
600 the accumulation of senescent T cells in mice. *Nat Commun* 11, 2482 (2020).

601

602

603

604

605

606

607

608

609 **TABLES**

610 **Table 1.**

**BpOmpW BPSL1552 peptide panel (accession no. CAH35553.1)** 611

| <b>Peptide</b> | <b>Peptide Name</b> | <b>AA Sequence</b>                  |
|----------------|---------------------|-------------------------------------|
| 1              | BPSL1552 (1-20)     | MRRQTIRTCTTAIACAAGLA <sup>612</sup> |
| 2              | BPSL1552 (11-30)    | TAIACAAGLAMIPSLSHAAS                |
| 3              | BPSL1552 (21-40)    | MIPSLSHAASPGEGINQGDI                |
| 4              | BPSL1552 (31-50)    | PGEGINQGDIIARVRGISIM <sup>613</sup> |
| 5              | BPSL1552 (41-60)    | IARVRGISIMPDERTSNTLS                |
| 6              | BPSL1552 (51-70)    | PDERTSNTLSALNVGVNNAI                |
| 7              | BPSL1552 (61-80)    | ALNVGVNNAIVPELDFTYMI                |
| 9              | BPSL1552 (71-90)    | VPELDFTYMIRDYLGVELIL                |
| 10             | BPSL1552 (81-100)   | RDYLGVELILGTSRHQITSS                |
| 11             | BPSL1552 (91-110)   | GTSRHQITSSLGDLGGVGVL                |
| 12             | BPSL1552 (101-120)  | LGDLGGVGVLPPPTLLLQYHF               |
| 13             | BPSL1552 (111-130)  | PPTLLLQYHFNHAGKVRPYV                |
| 14             | BPSL1552 (121-140)  | NHAGKVRPYVGAGINYTLFY                |
| 15             | BPSL1552 (131-150)  | GAGINYTLFYNNGLHAGGEG                |
| 16             | BPSL1552 (141-160)  | NNGLHAGGEGIGINNHSFGP                |
| 17             | BPSL1552 (151-170)  | IGINNHSFGPALQFGVDVQV                |
| 18             | BPSL1552 (161-180)  | ALQFGVDVQVTKKVFVNVDV                |
| 19             | BPSL1552 (171-190)  | TKKVFVNVDVKKIWMHTDAT                |
| 20             | BPSL1552 (181-200)  | KKIWMHTDATLGGQPLGRLN                |
| 21             | BPSL1552 (191-214)  | LGGQPLGRLNIDPLVVGVGVMKF             |

614 **FIGURE LEGENDS:**

615 **Figure 1. BpOmpW activated T cells and induced effector CD4<sup>+</sup> and CD8<sup>+</sup> T cells.**

616 A) Schematic illustration of the experimental timeline of non-insulin resistant mouse  
617 study. B) Percentages of parent cells expressing CD45RB. C to F) Percentages of CD4  
618 and CD8 T cells expressing CD25 and CD44 activation markers. G to K) Percentages of  
619 different populations of CD4 and CD8 T cells defined by different levels of CD45RB and  
620 CD44 such as (G) effector CD4 T cells CD45RB<sup>low</sup> CD44<sup>high</sup>, (H) naïve CD4 T cells  
621 CD45RB<sup>high</sup> CD44<sup>low</sup>, (I) effector CD45RB<sup>high</sup> CD44<sup>high</sup> CD8 T cells, (M) effector  
622 CD8 T cells CD45RB<sup>low</sup> CD44<sup>high</sup> and (K) naïve CD8 T cells CD45RB<sup>high</sup> CD44<sup>low</sup>.  
623 SAS: splenocytes from adjuvant only immunised mice exposed to BpOmpW (Orange  
624 circles, Control). OmpW-SAS: splenocytes from SAS adjuvanted BpOmpW immunized  
625 mice re-exposed with BpOmpW in vitro (Purple circles, Treatment). Asterisks denote  
626 statistically significant differences according to two-tailed t-test. The significant levels  
627 are represented as follows: (p < 0.05, \*); (p < 0.01, \*\*); (p < 0.001, \*\*\*) (p < 0.0001,  
628 \*\*\*\*).

629 Figure 2. BpOmpW stimulated CD8<sup>hi</sup> and CD4<sup>hi</sup> populations that are CD45RB<sup>hi</sup>  
630 CD44<sup>lo</sup>. A-B) CD8<sup>hi</sup> (in red) and CD4<sup>hi</sup> (in blue) populations splenocytes from both  
631 SAS adjuvanted BpOmpW immunized mice re-exposed to BpOmpW (A) and from  
632 adjuvant only immunised mice exposed to BpOmpW (B). C-D) CD4 (C) and CD8 (D) T  
633 cell co-expression of CD45RB and CD44 in BpOmpW re-exposed splenocytes from SAS  
634 adjuvanted BpOmpW immunized mice. E-F) CD4 (E) and CD8 (F) T cell co-expression  
635 of CD45RB and CD44 in BpOmpW exposed splenocytes from SAS adjuvanted saline  
636 immunized mice.

637 **Figure 3. BpOmpW immunisation stimulated IFN- $\gamma$  responses in CD4<sup>+</sup>, CD8<sup>+</sup>, NK**  
638 **and NKT cells and upregulated regulatory T cells.** A-B) Percentages of CD4 (A) and

639 CD8 (B) T cells expressing IL-2 cytokine. (C-E) Percentages of CD4 T cells expressing  
640 IFN- $\gamma$  (C), IL-4 (D) and IL-17 (E). G) Percentage of Double Negative (DN) cells (CD4<sup>+</sup>  
641 CD8<sup>-</sup>). H) Percentage of Natural Killer T cells (NKT). (I-K) Percentages of NKT cells  
642 expressing IFN- $\gamma$  (I), IL-17 (J) and IL-4 (K). L) Percentages of Natural Killer (NK) cells  
643 expressing IFN- $\gamma$ . M) Percentages of Regulatory T cells (Tregs). N-O) Percentages of  
644 CD4 (N) and CD8 (O) T cells expressing TNF. SAS: splenocytes from adjuvant only  
645 immunised mice exposed to BpOmpW (Orange circles, Control). OmpW-SAS:  
646 splenocytes from SAS adjuvanted BpOmpW immunized mice re-exposed with BpOmpW  
647 in vitro (Purple circles, Treatment). Asterisks denote statistically significant differences  
648 according to two-tailed t-test. The significant levels are represented as follows: ( $p < 0.05$ ,  
649 \*); ( $p < 0.01$ , \*\*); ( $p < 0.001$ , \*\*\*) ( $p < 0.0001$ , \*\*\*\*).

650 **Figure 4. Insulin resistant mice mimicked with some changes the immune response**  
651 **to BpOmpW produced by non-insulin resistant mice.** A) Percentages of CD45RB  
652 marker in total T cells. (B-E) Percentages of CD4 and CD8 T cells expressing CD25 and  
653 CD44 activation markers. F-G) Percentages of CD4 (F) and CD8 (G) T cells expressing  
654 IL-2 cytokine. H-J) Percentages of CD4 T cells expressing IFN- $\gamma$  (H), IL-17 (I) and IL-  
655 4(J). K-M) Percentages of CD8 (K), NKT (L) and NK (M) cells expressing IFN- $\gamma$ . N-O)  
656 Percentages of NKT cells expressing IL4 (N) and IL17 (O). P) Percentages of regulatory  
657 T cells (Tregs). Q-R) Percentages of CD4 (Q) and CD8 (R) T cells expressing TNF  
658 cytokine. SAS: splenocytes from adjuvant only immunised mice exposed to BpOmpW  
659 (Orange circles, Control). OmpW-SAS: splenocytes from SAS adjuvanted BpOmpW  
660 immunized mice re-exposed with BpOmpW in vitro (Purple circles, Treatment).  
661 Asterisks denote statistically significant differences according to two-tailed t-test. The  
662 significant levels are represented as follows: ( $p < 0.05$ , \*); ( $p < 0.01$ , \*\*); ( $p < 0.001$ , \*\*\*)  
663 ( $p < 0.0001$ , \*\*\*\*).

664 **Figure 5. BpOmpW induced**

665 **the production of IFN- $\gamma$  in HLA-DR and HLA-DQ transgenic mice.** Immunization  
666 of HLA-DR and -DQ transgenic mice highlights HLA class II determined  
667 immunodominant epitopes of BpOmpW. Mice transgenic for HLA-DR4,  $n = ?$ , (A);  
668 HLA-DR1,  $n = ?$  (B); and HLA-DQ8 (DQB1\*0302),  $n = ?$  (C) were primed with 25  $\mu$ g  
669 rBpOmpW and draining lymph node cells were assayed with IFN- $\gamma$  ELISpot in response  
670 to the indicated peptide at day 10. Data are plotted as SFCs per  $10^6$  cells for individual  
671 mice. Responses to peptide were defined as positive if SFC > mean + 2 SD of the response  
672 in the absence of any antigen (shown as horizontal dotted line).

673 **Figure 6. BpOmpW induced T cell proliferation in human PBMCs.** A) Proliferation  
674 of CD3, CD4 and CD8 populations in three different donor PBMCs by BpOmpW or SAS-  
675 adjuvanted BpOmpW, measured as stimulation index. B) IFN- $\gamma$  production (pg/mL) in  
676 the supernatant of the three proliferation assays. SAS: human PBMCs exposed to  
677 adjuvant alone (Orange circles, Control). OmpW: human PBMCs exposed to BpOmpW  
678 alone. OmpW-SAS: human PBMCs exposed to BpOmpW + SAS adjuvant. Asterisks  
679 mark significant differences according to two-tailed Student's t-test. The significant levels  
680 are represented as follows: (p < 0.05, \*); (p < 0.01, \*\*); (p < 0.001, \*\*\*) (p < 0.0001,  
681 \*\*\*\*).

682

683 **Figure 7. BpOmpW specific IgG responses in plasma from Melioidosis survivors.**

684 Detection by ELISA of BpOmpW-specific IgGs in different plasma from different  
685 cohorts (NE, Non-Endemic; HH: Healthy Householders; D, Healthy Diabetics; M:  
686 Melioidosis diabetics survivors). Asterisks mark significant differences according to two-  
687 tailed Student's t-test. The significant levels are represented as follows: (p < 0.05, \*); (p  
688 < 0.01, \*\*); (p < 0.001, \*\*\*) (p < 0.0001,\*\*\*\*).

**Figure 1**

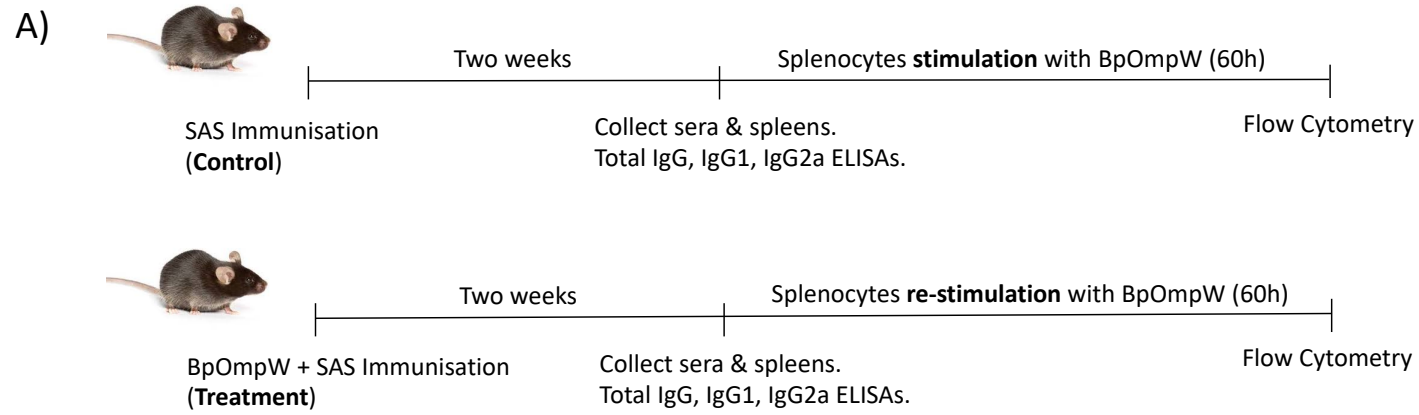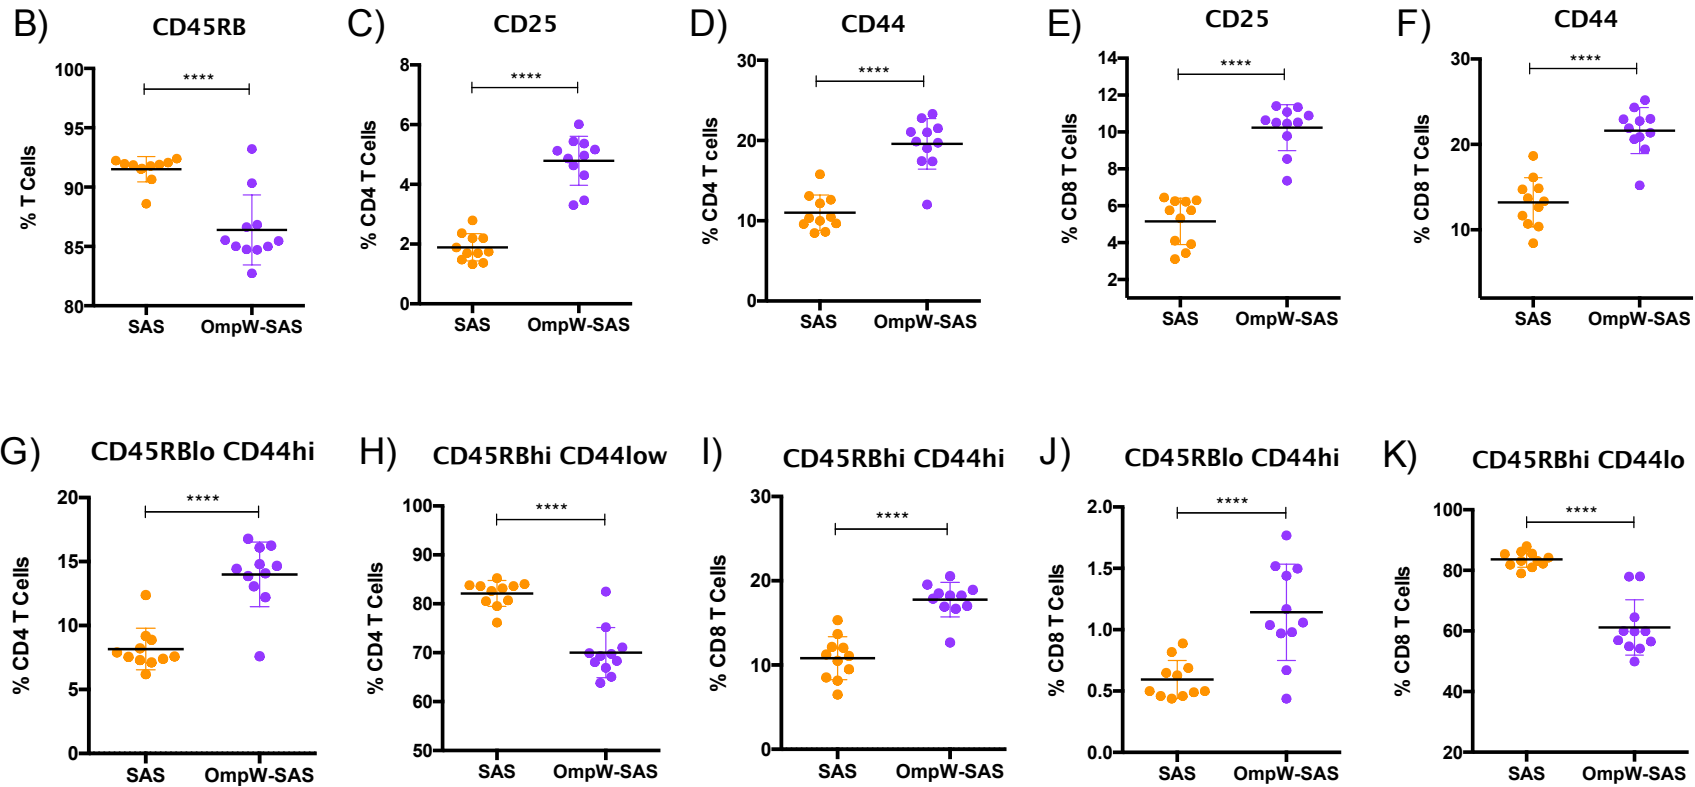

**Figure 2**

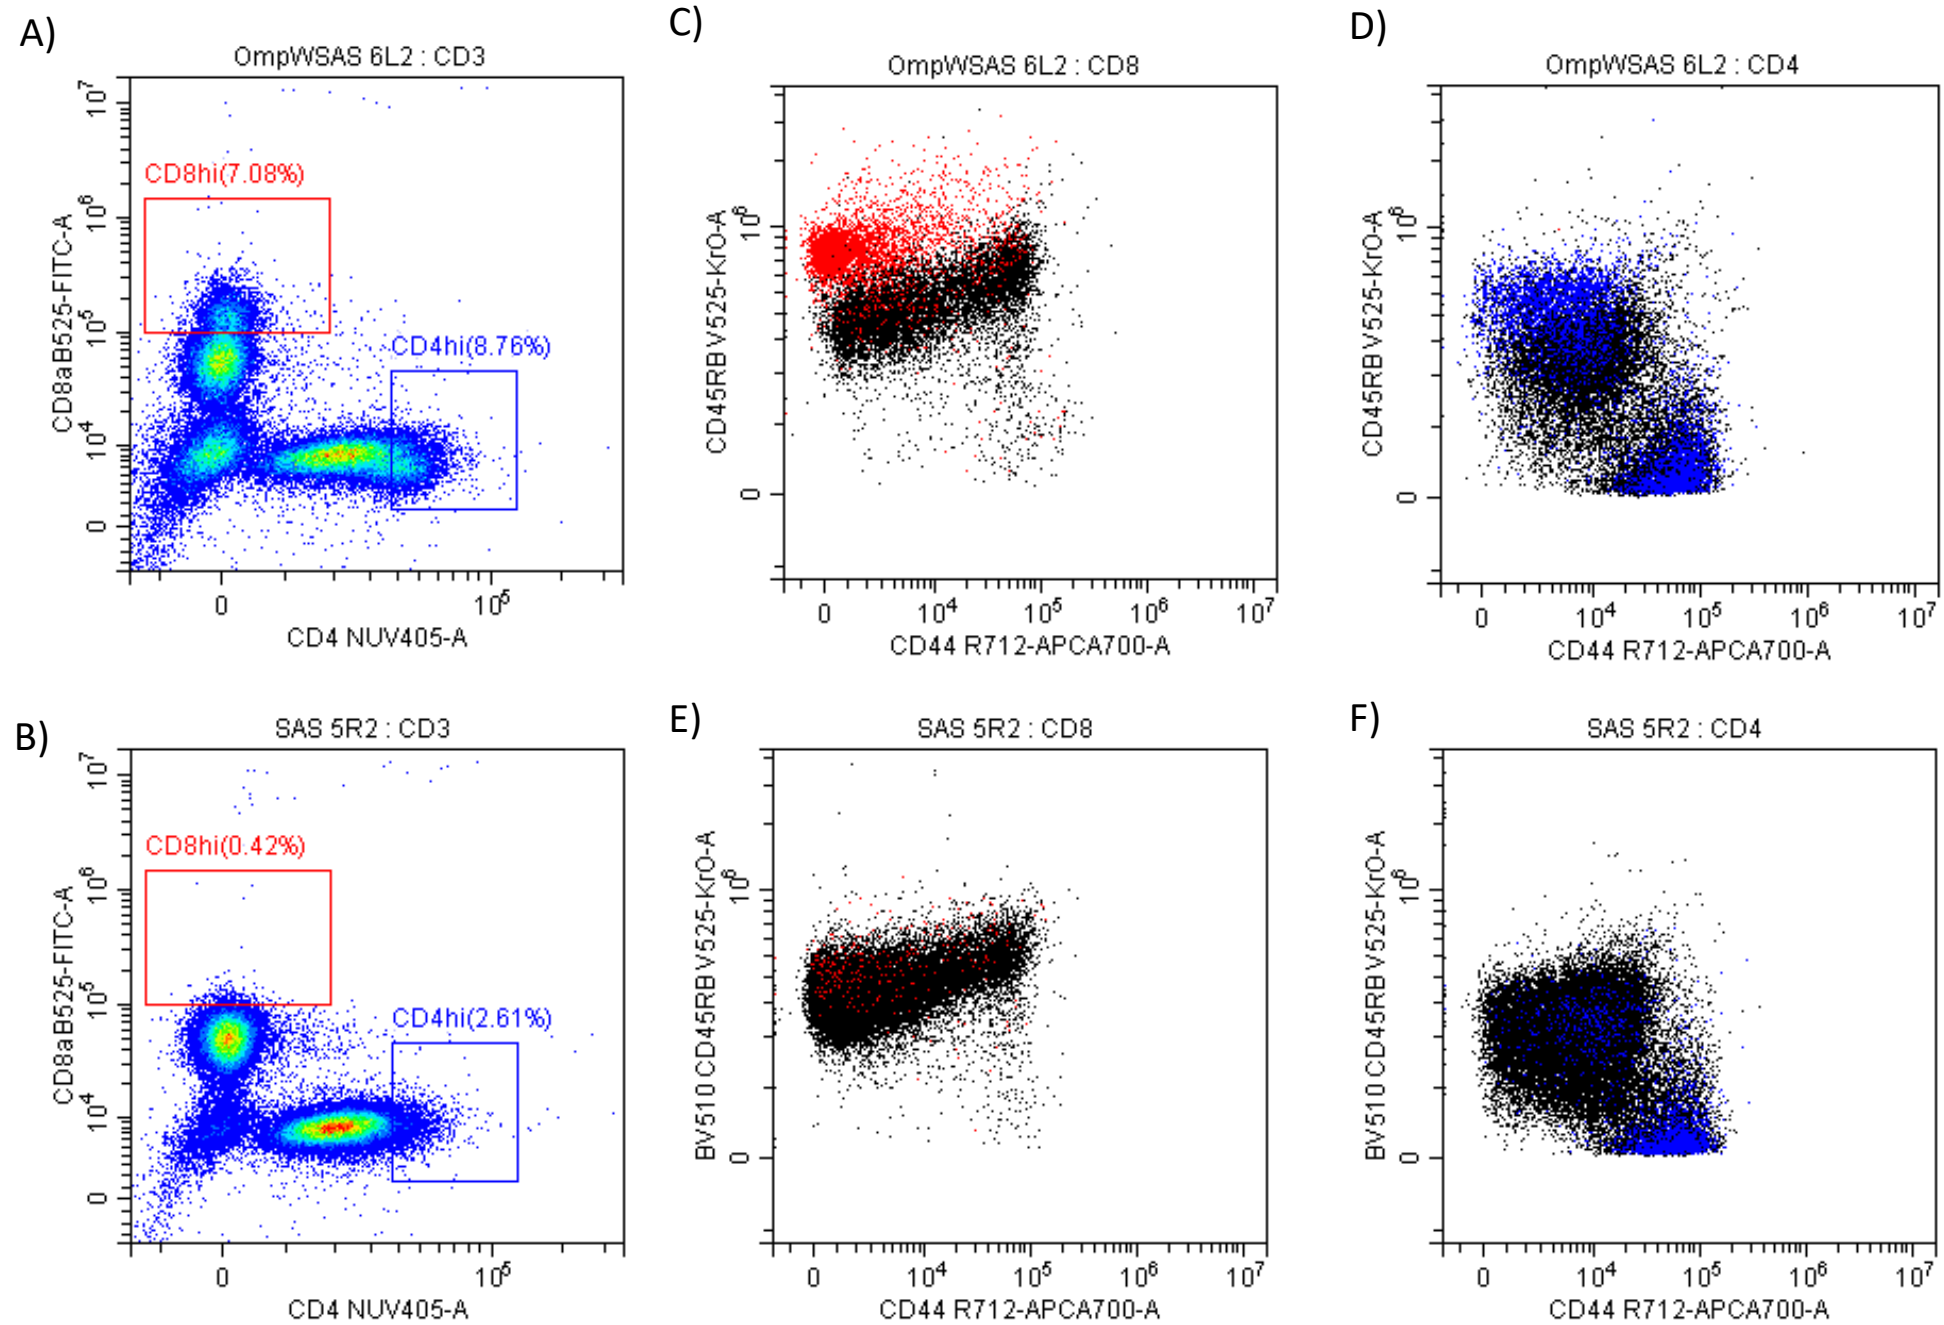

**Figure 3**

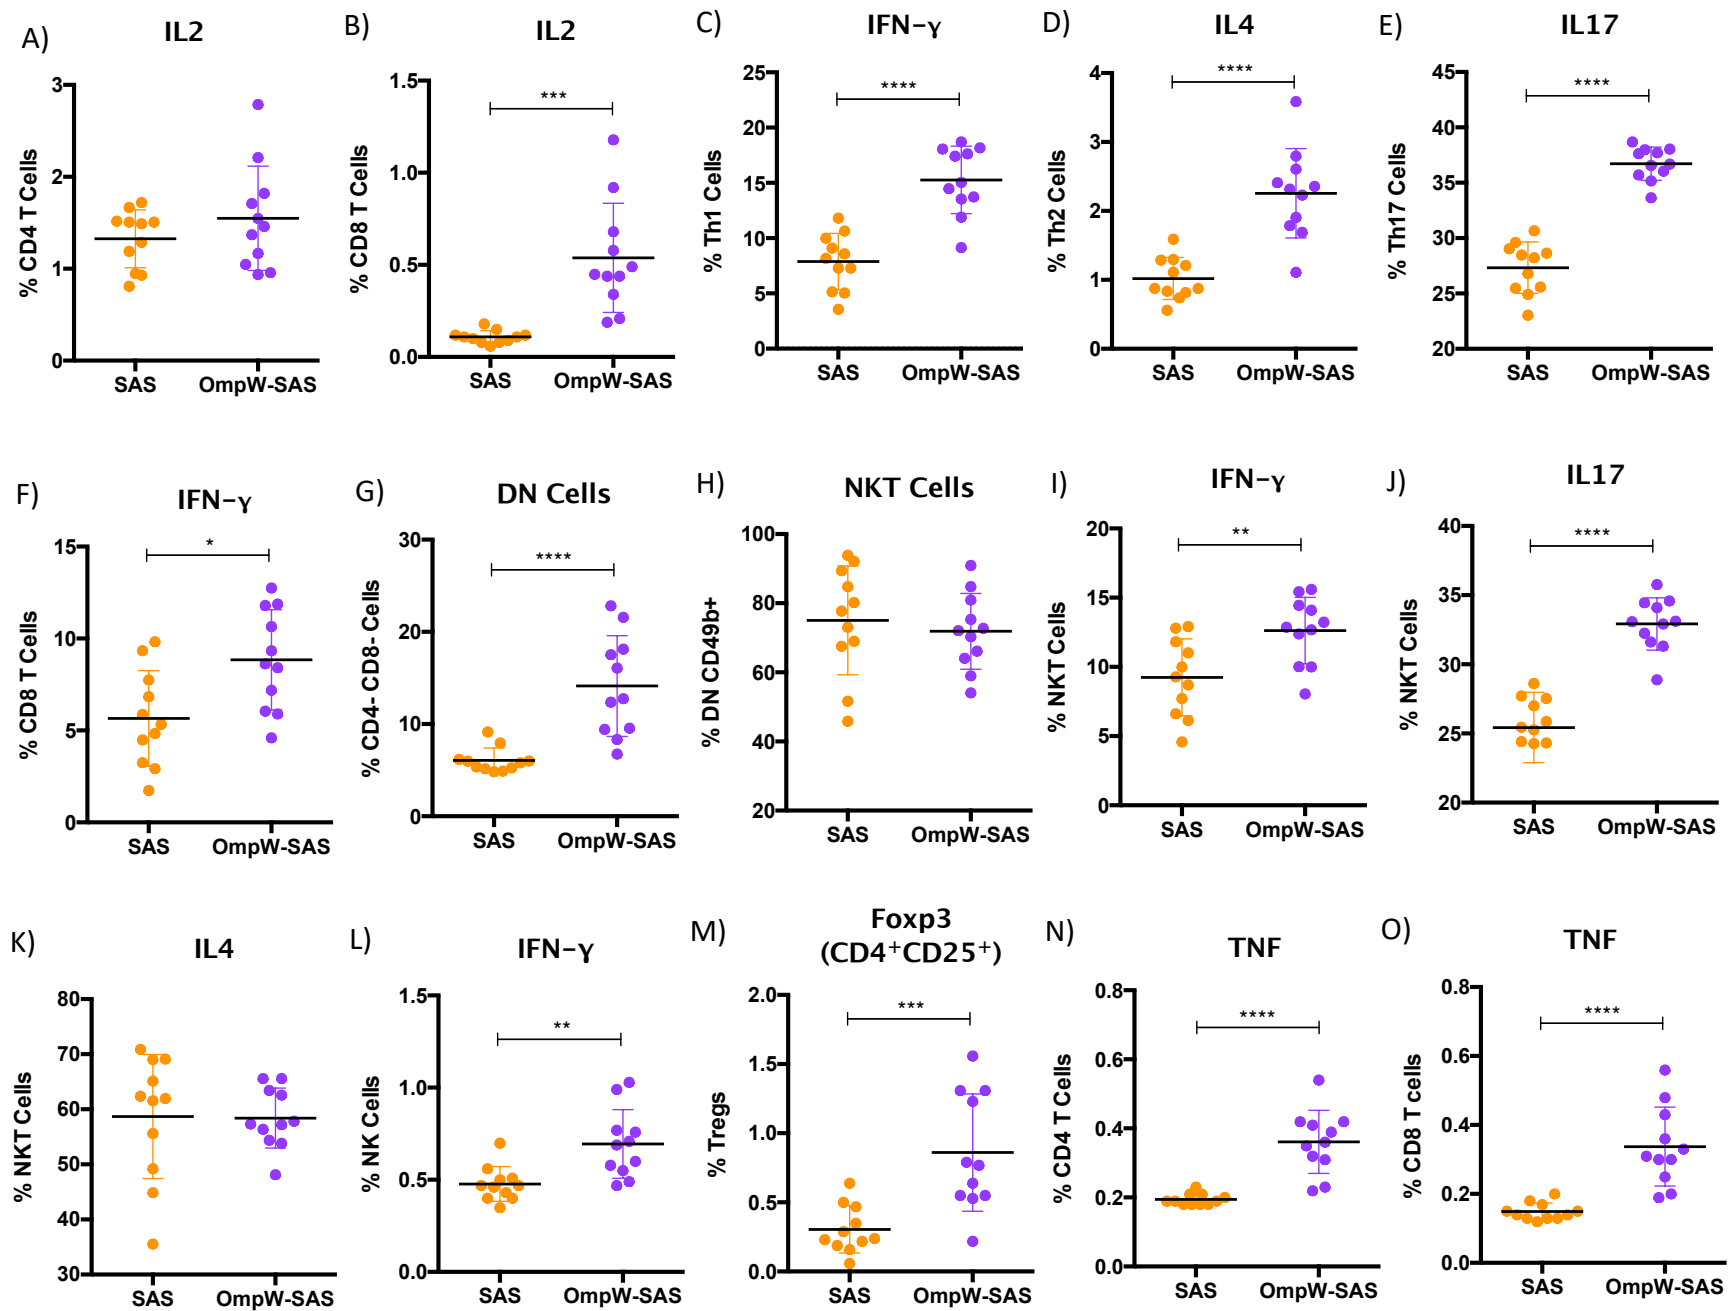



**Figure 4**

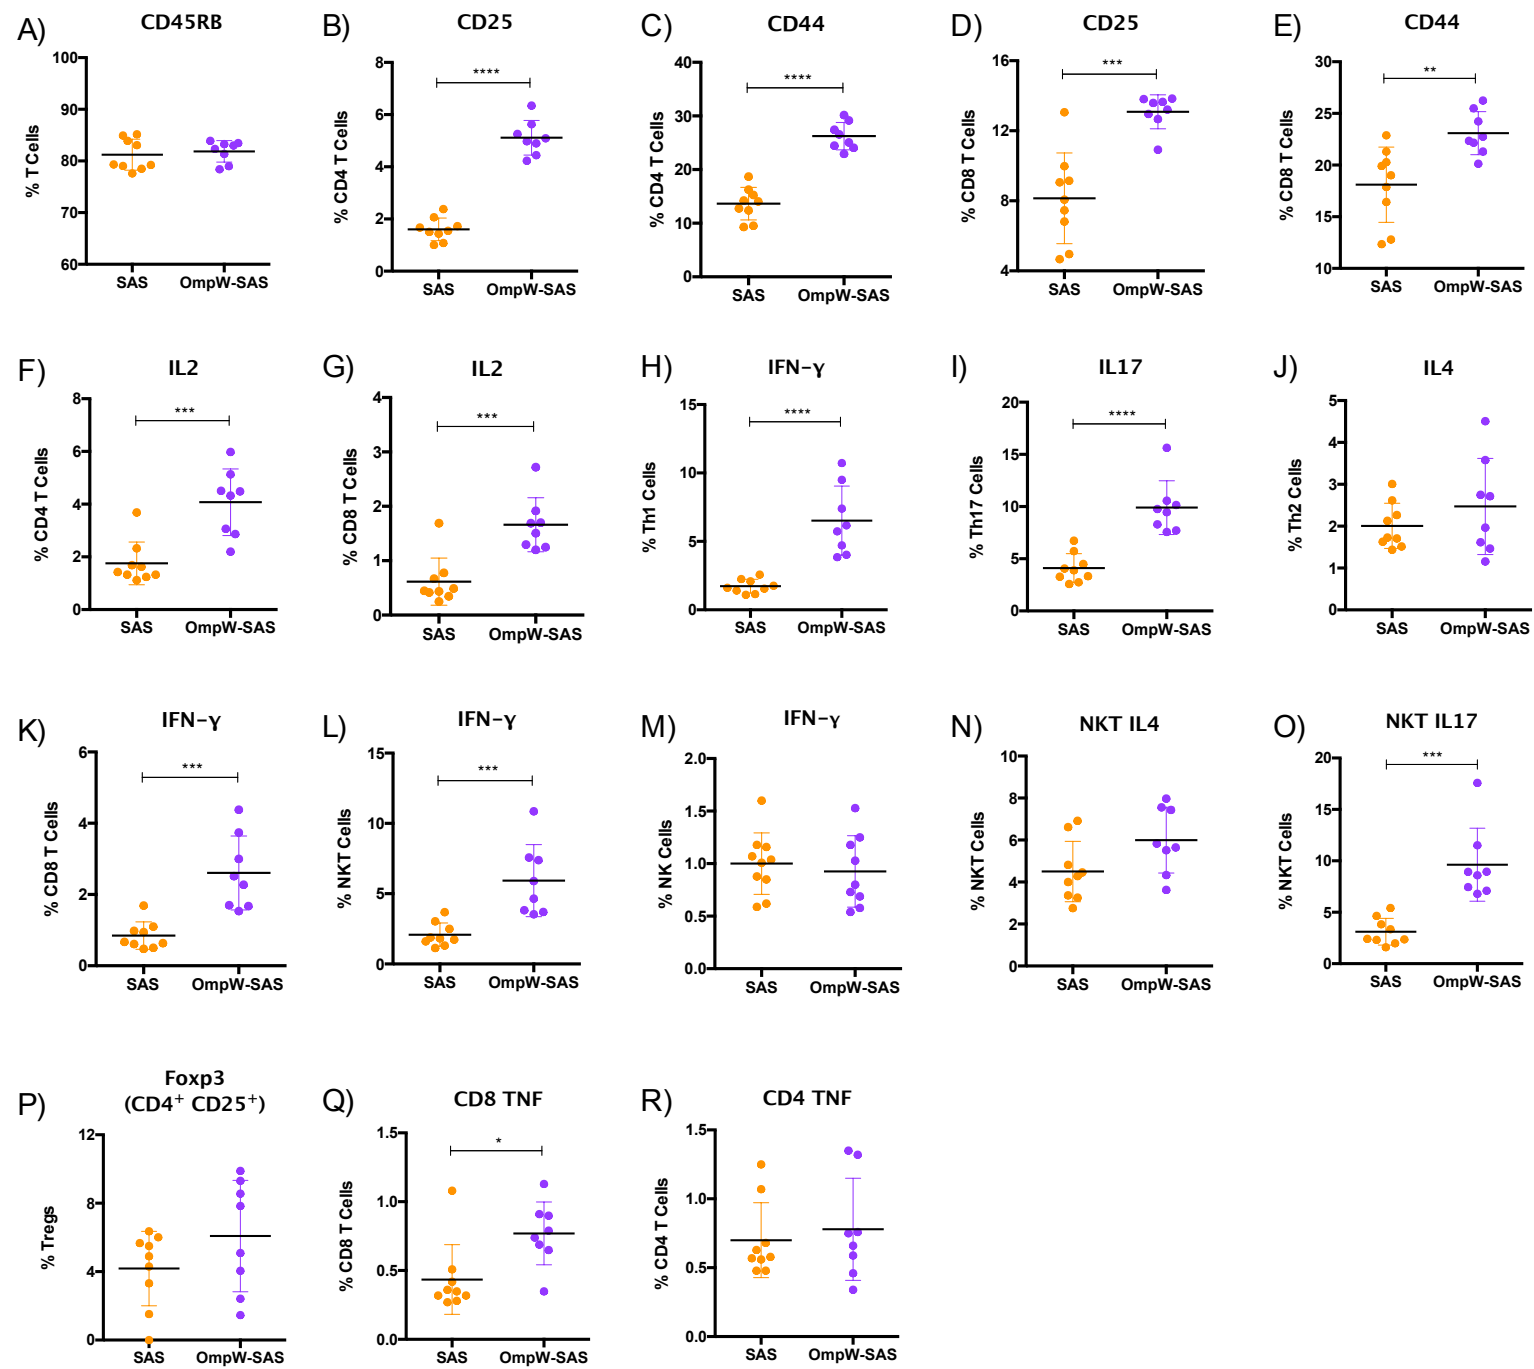

# Figure 5

## A) HLA-DR4

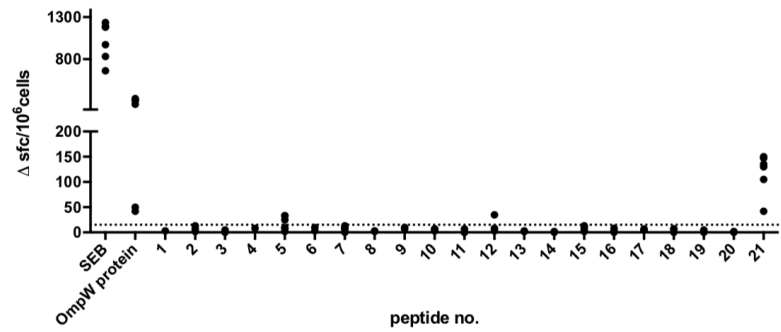

## C) HLA-DR1

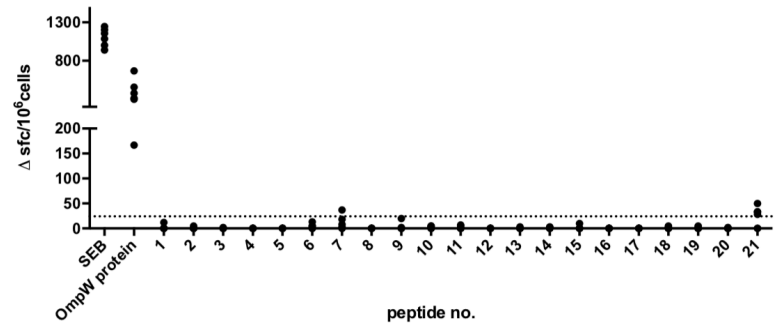

## D) HLA-DQ8

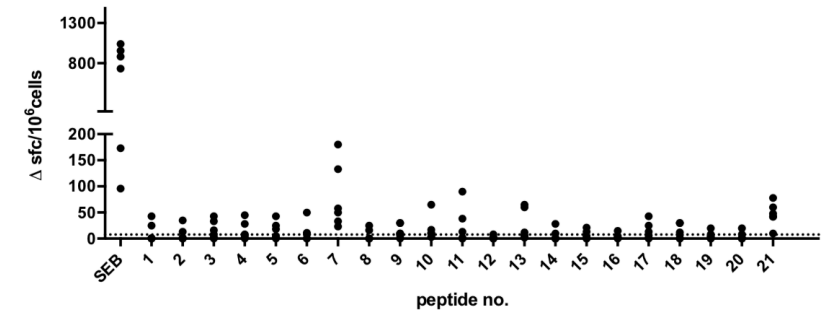

## B)

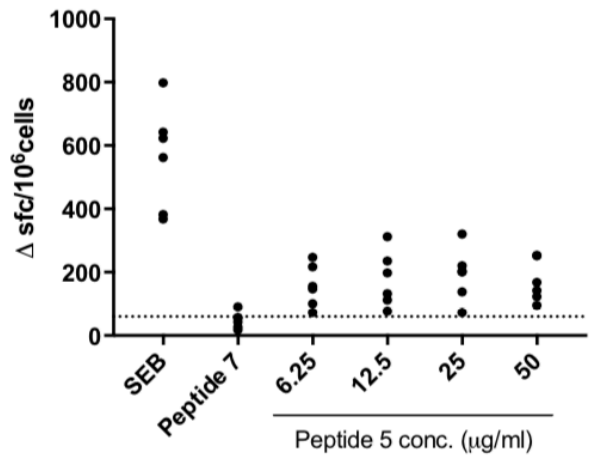

## E)

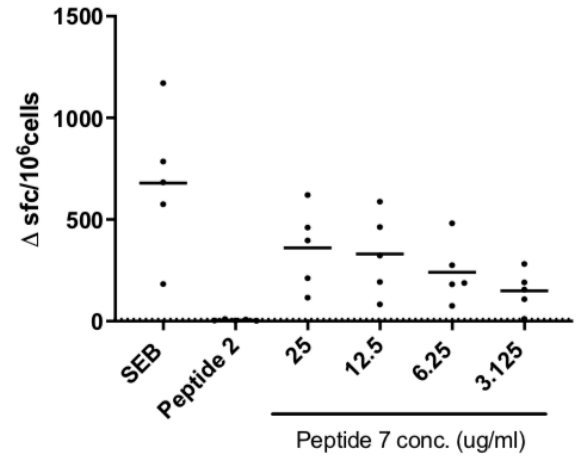

**Figure 6**

**A)**

**Donor 301**

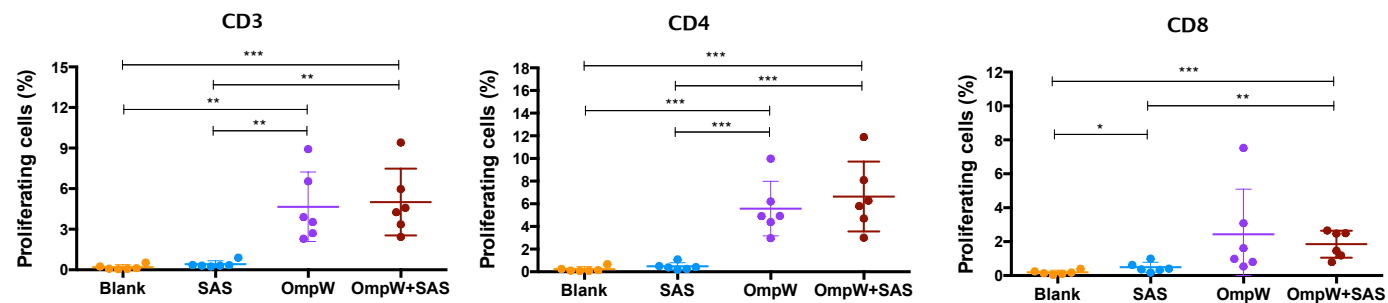

**Donor 314**

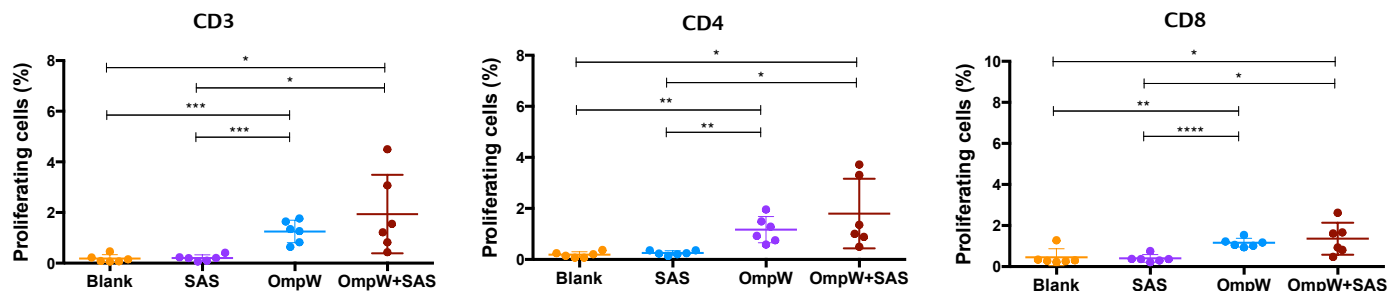

**Donor 645**

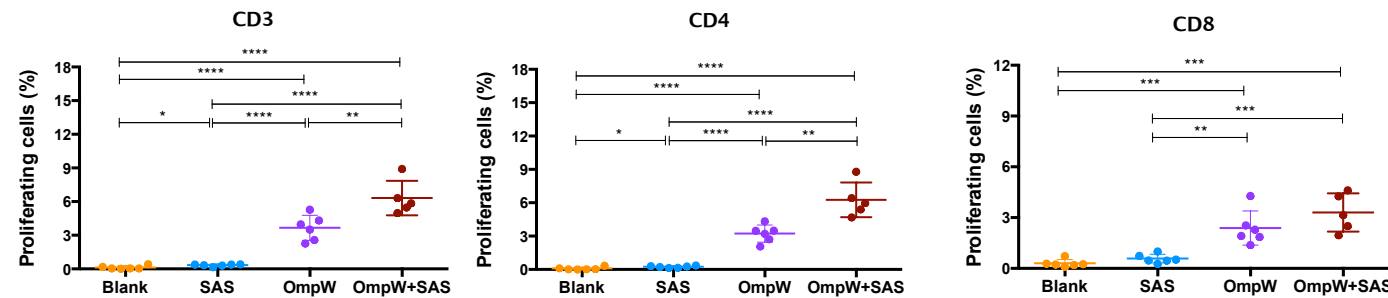

**B)**

**Donor 301**

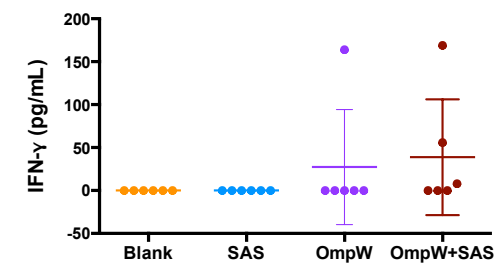

**Donor 314**

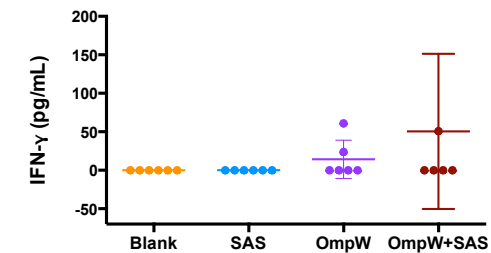

**Donor 645**

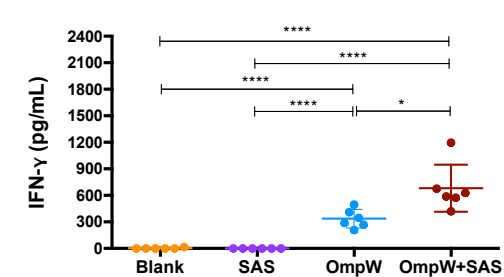

Figure 7

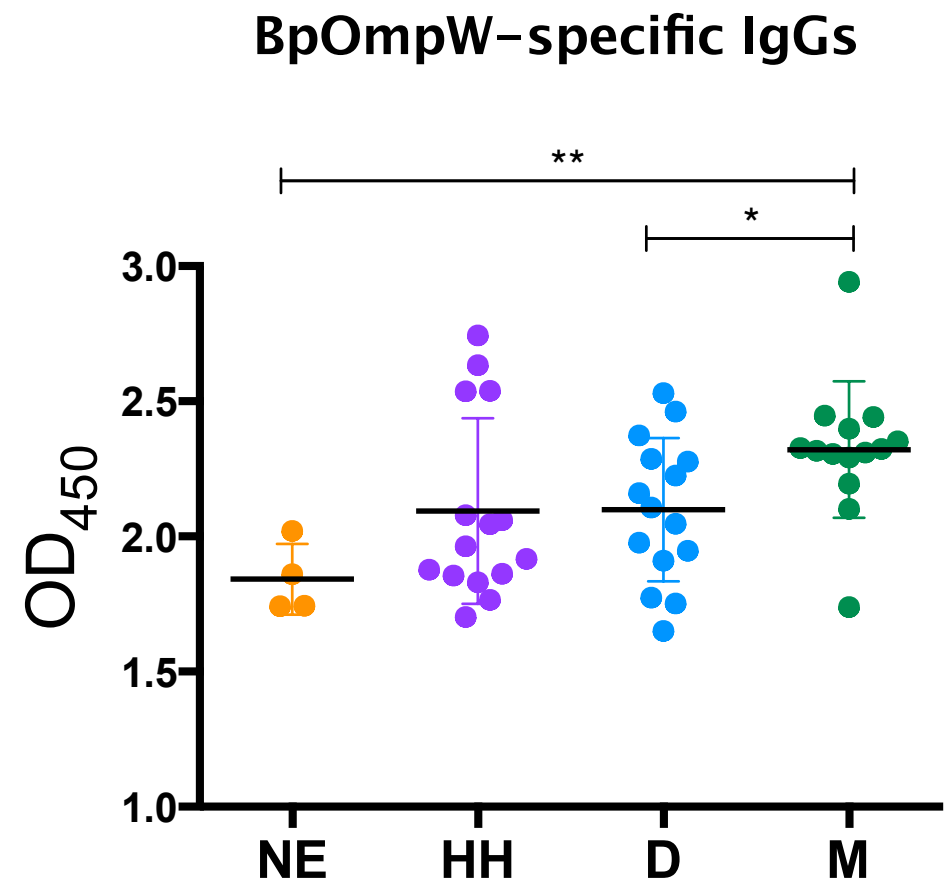

Source: https://www.biorxiv.org/content/10.1101/2021.05.16.444297v1.full.pdf
